# Supplementary material for: Improved neural differentiation of stem cells mediated by magnetic nanoparticle-based biophysical stimulation
Source: Royal Society of Chemistry journal article supplement (doi:10.1039/c9tb00678h), 2019-01-01
Supplement: c9tb00678h1.pdf [file c9tb00678h1.pdf]

**Electronic supplementary information for:**

**Improved Neural Differentiation of Stem Cells mediated by  
Magnetic Nanoparticles-based Biophysical Stimulation**

Ran Dai<sup>a</sup>, Yingjie Hang<sup>a</sup>, Qi Liu<sup>a</sup>, Sixuan Zhang<sup>a</sup>, Lei Wang<sup>\*a</sup>, Yue Pan<sup>\*b</sup> and Hong  
Chen<sup>\*a</sup>

<sup>a</sup> State and Local Joint Engineering Laboratory for Novel Functional Polymeric  
Materials, College of Chemistry, Chemical Engineering and Materials Science,  
Soochow University, Suzhou 215123, P. R. China.

<sup>b</sup> Guangdong Provincial Key Laboratory of Malignant Tumor Epigenetics and Gene  
Regulation, Medical Research Center, Sun Yat-Sen Memorial Hospital, Sun Yat-Sen  
University, Guangzhou, 510120, P. R. China.

\*Corresponding author:

Lei Wang, E-mail: [wanglei2@suda.edu.cn](mailto:wanglei2@suda.edu.cn)

Yue Pan, E-mail: [panyue@mail.sysu.edu.cn](mailto:panyue@mail.sysu.edu.cn)

Hong Chen, E-mail: [chenh@suda.edu.cn](mailto:chenh@suda.edu.cn)

**Tab. S1** Size and zeta-potential of MIONs dispersed in different solvents at different  
times.

|                | H <sub>2</sub> O | PBS   | DMEM  |
|----------------|------------------|-------|-------|
| Size/nm (0 h)  | 56.1             | 56.9  | 301.0 |
| Size/nm (24 h) | 56.8             | 56.5  | 637.8 |
| Zeta/mV (0 h)  | -24.2            | -22.6 | -13.8 |
| Zeta/mV (24 h) | -24.9            | -22.2 | -13.9 |

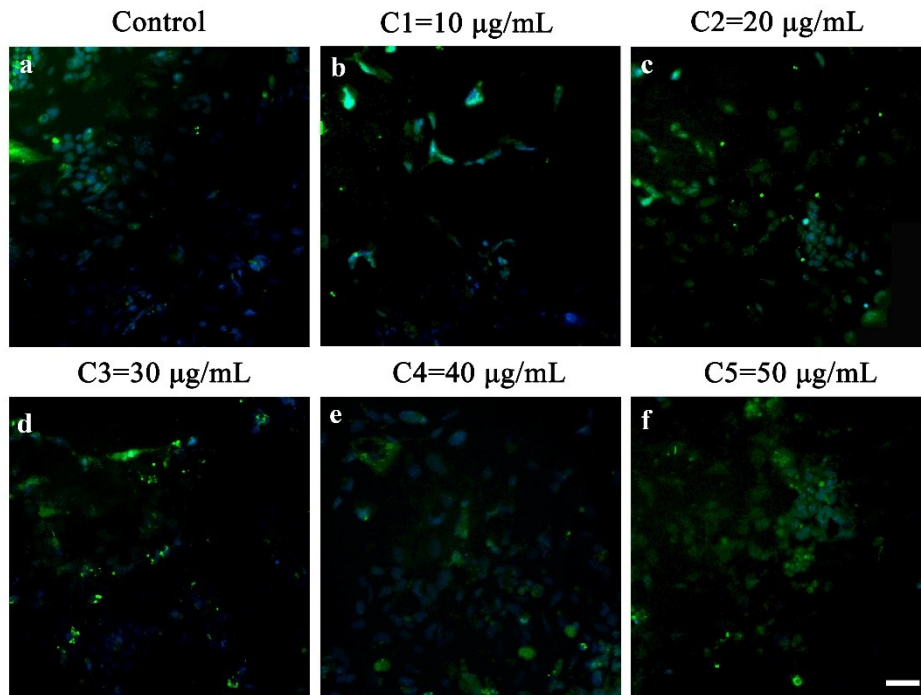

**Fig. S1** Immunofluorescence results of cells cultured in medium containing different concentrations of DHCA. The concentrations of DHCA from figure a to figure f were 0, 0.1, 0.2, 0.3, 0.4 and 0.5 mM respectively (Scale bar: 50µm).

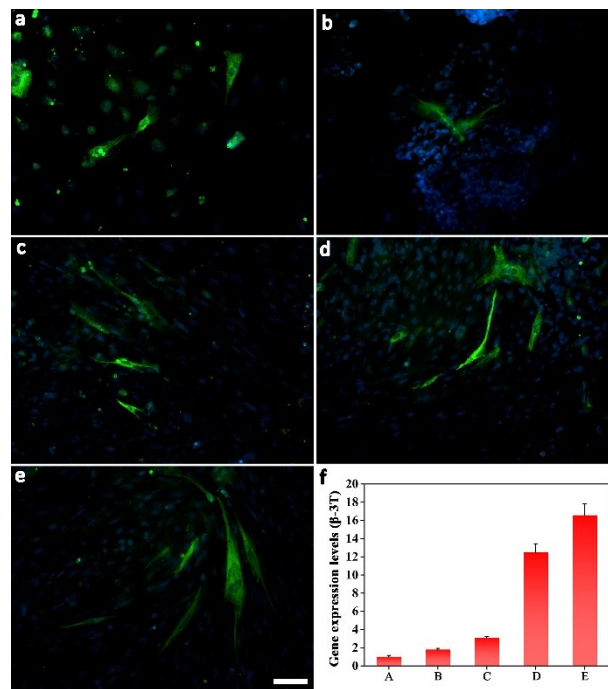

**Fig. S2** Immunofluorescence results of mESCs cultured in different conditions for 7 days (a-e), green represented neural marker β3-tubulin, blue represented nucleus of

cells(Scale bar: 50  $\mu$ m). (a) Cells untreated. (b) Cells cultured under a magnetic field. (c) Cells cultured with MIONs. (d) Cells cultured with MIONs under a magnetic field. Cells in (a), (b), (c), (d) were cultured in medium without RA. Cells in (e) were treated with RA. (f) Results of the relative mRNA levels of mature neural marker gene  $\beta$ 3-tubulin.

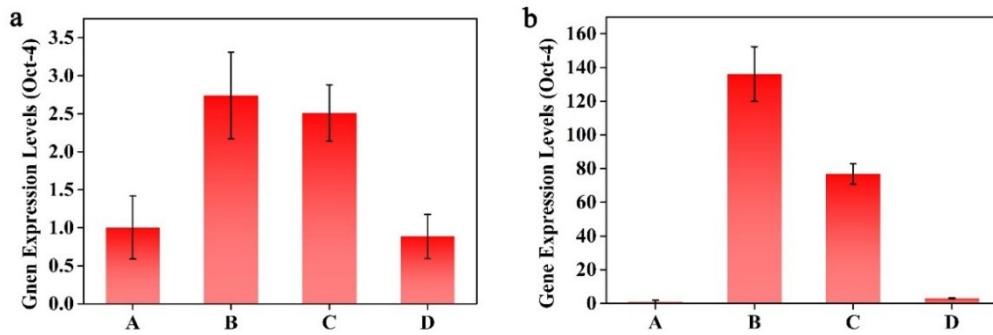

**Fig. S3** Relative mRNA levels of pluripotent marker gene Oct-4 in mESCs cultured for (a) 7 days, (b) 14 days, respectively. (A) Cells untreated. (B) Cells cultured under a magnetic field. (C) Cells cultured with MIONs. (D) Cells cultured with MIONs under a magnetic field.
